# Supplementary material
Source: PubMed Central journal article supplement (PMC55527)
Supplement: pnas_171579898_1.pdf [file pnas_171579898_1.pdf]

Supplementary material for Zhu *et al.* (August 7, 2001) *Proc. Natl. Acad. Sci. USA*, 10.1073/pnas.171579898.

**Table 2. Bacterial strains**

| <b>Strains</b> | <b>Genotype</b>                                                       | <b>Source or ref.</b>                                   |
|----------------|-----------------------------------------------------------------------|---------------------------------------------------------|
| MG1655         | F <sup>-1</sup> , λ <sup>-1</sup>                                     | Coli Genetic Stock Center                               |
| DM750          | Δ( <i>cysB topA</i> )218 <i>acrA12 gyrA224</i>                        | 10, 11                                                  |
| DM800          | Δ( <i>cysB topA</i> )204 <i>acrA13 gyrB225</i>                        | 10, 11                                                  |
| CAG12178       | MG1655 <i>zei-723::Tn10</i><br>(86% cotransducible with <i>gyrA</i> ) | M. Drolet                                               |
| CAG18499       | MG1655 <i>zid-501::Tn10</i><br>(60% cotransducible with <i>gyrB</i> ) | M. Drolet                                               |
| QZ103          | MG1655 Δ <i>topB::aphA</i>                                            | P1:QZ102 x MG1655, kan <sup>r</sup>                     |
| QZ114          | DM750 <i>zei-723::Tn10</i>                                            | P1: CAG12178 x DM750, tet <sup>r</sup>                  |
| QZ115          | MG1655 <i>zei-723::Tn10 gyrA224</i>                                   | P1: QZ114 x MG1655, tet <sup>r</sup> , Bgl <sup>+</sup> |
| QZ116          | MG1655 <i>zei-723::Tn10 gyrA224</i><br>Δ <i>topB::aphA</i>            | P1: QZ103 x QZ116, kan <sup>r</sup>                     |
| QZ117          | DM800 <i>zid-501::Tn10</i>                                            | P1: CAG18499 x DM800, tet <sup>r</sup>                  |
| QZ118          | MG1655 <i>zid-501::Tn10 gyrB225</i>                                   | P1: QZ118 x MG1655, tet <sup>r</sup> , Bgl <sup>+</sup> |
| QZ119          | MG1655 <i>zid-501::Tn10 gyrB225</i><br>Δ <i>topB::aphA</i>            | P1: QZ103 x QZ120, kan <sup>r</sup>                     |

The genotypes and source of the *E. coli* strains used in this study are indicated. In the case of P1 transductions, relevant antibiotic selection markers are provided.
