# Supplementary material
Source: PubMed Central journal article supplement (PMC55527)
Supplement: pnas_171579898_2.pdf [file pnas_171579898_2.pdf]

**Table 3. Effect of the repression of type I topoisomerase activity on cell viability**

| Strain                        | Time, hr | Viable cell count, cells/ml |                   |
|-------------------------------|----------|-----------------------------|-------------------|
|                               |          | + Arabinose                 | + Glucose         |
| DM750 $\Delta topB$ /pTBE 302 | 4        | $7.4 \times 10^6$           | $6.1 \times 10^3$ |
|                               | 8        | $8.1 \times 10^7$           | $1.8 \times 10^4$ |
|                               | 12       | $6.3 \times 10^9$           | $6.9 \times 10^3$ |
| DM800 $\Delta topB$ /pTBE 302 | 4        | $3.3 \times 10^6$           | $5.4 \times 10^3$ |
|                               | 8        | $1.6 \times 10^7$           | $4.9 \times 10^3$ |
|                               | 12       | $4.7 \times 10^9$           | $7.9 \times 10^3$ |

Cultures of the indicated strains were grown overnight in medium containing arabinose. Cells were harvested, washed, and diluted in medium containing either glucose or arabinose at an initial density of  $1.0 \times 10^6$  cells per ml. Viable cell count was determined by plating an aliquot of the cultures on plates containing arabinose as described in *Materials and Methods*.
