# Supplementary material
Source: PubMed Central journal article supplement (PMC55527)
Supplement: pnas_171579898_3.pdf [file pnas_171579898_3.pdf]

Supplementary material for Zhu *et al.* (August 7, 2001) *Proc. Natl. Acad. Sci. USA*, 10.1073/pnas.171579898.

**Table 4. *topB* deletion strains containing gyrase compensatory mutations are viable**

| Strains | Relevant genotype       | P1 transduction frequency ( $\times 10^{-8}$ )* |
|---------|-------------------------|-------------------------------------------------|
| MG1655  | <i>gyr</i> <sup>+</sup> | 2.14 $\pm$ 0.14                                 |
| QZ116   | <i>gyrA224</i>          | 1.99 $\pm$ 0.06** ( <i>P</i> = 0.989)           |
| QZ119   | <i>gyrB225</i>          | 2.06 $\pm$ 0.11** ( <i>P</i> = 0.985)           |

Bacterial strains MG1655, MG1655 *gyrA224*, and MG1655 *gyrB225* were transduced to  $\Delta$ *topB::aphA*. Bacterial strains DM750 and DM800 contain a chromosomal deletion that encompasses *cysB* and *topA*; therefore, a true isogenic parent strain was unavailable. Strain MG1655, a prototype wild-type strain of *E. coli*, was transduced to *gyrA224* and *gyrB225* as described by Miller (1). The cells exhibited a normal growth rate and morphology (data not shown).

\*The frequency of P1  $\Delta$ *topB::aphA* transductants was determined by calculating the total colony numbers of transduced cells per total cell number. The values are presented as mean  $\pm$  SD (*n* = 5). A hypothesis test was used to compare the numbers of individual mutants to that of wild-type strain. *P* < 0.05 was considered statistically significant.

\*\**P* > 0.05 indicates no significant differences vs. wild-type control groups.

Reference:

1. Miller, J. H. (1992) *A Short Course in Bacterial Genetics* (Cold Spring Harbor Lab. Press, Plainview, NY).
